# Supplementary material
Source: MDPI journal article supplement (https://www.mdpi.com/2071-1050/15/5/4663)
Supplement: s1 [file s1 › sustainability-2163024-supplementary-new.pdf]

# Potential barriers to the practice of sustainable interior architecture and design in Egypt

Name

Contact Email

Contact Phone No

**Please indicate your years of experience in line construction projects**

- (a) Less than 5 years      (b) 5 to 10 years      (c) 10 to 15 years  
(d) 15 to 20 years      (e) More than 20 years

**Please indicate your highest level of education qualification**

- (a) Bachelor's degree      (b) Diploma      (c) Master's degree  
(d) PhD      (e) Other

**What is the influence of the following barriers to the practice of sustainable interior architecture and design?**

|                                                                                                 | Very high | high | Neutral | Low | very low |
|-------------------------------------------------------------------------------------------------|-----------|------|---------|-----|----------|
| Increased expenses caused by eco-friendly building methods.                                     |           |      |         |     |          |
| Sustainable project research and development expenditures                                       |           |      |         |     |          |
| Costs associated with the upkeep of sustainable technology integrated into sustainable projects |           |      |         |     |          |
| Sustainable projects have a high environmental evaluation rating and certification cost         |           |      |         |     |          |
| Long investment return for sustainable initiatives                                              |           |      |         |     |          |
| The increased price of eco-friendly materials                                                   |           |      |         |     |          |
| Sustainable initiatives require more time (extended construction duration)                      |           |      |         |     |          |

|                                                                                                                 | Very high | high | Neutral | Low | very low |
|-----------------------------------------------------------------------------------------------------------------|-----------|------|---------|-----|----------|
| The reluctance of designers to change                                                                           |           |      |         |     |          |
| Lack of faith in sustainability and its sound effects.                                                          |           |      |         |     |          |
| The local market lacks dependable, sustainable materials and components.                                        |           |      |         |     |          |
| The local market's restricted availability of sustainable materials and components.                             |           |      |         |     |          |
| Conflict of interest between construction parties                                                               |           |      |         |     |          |
| Indifference from the client.                                                                                   |           |      |         |     |          |
| Designers lack the motivation to practise responsibly and convince customers to embrace sustainable strategies. |           |      |         |     |          |

|                                                                                                      | Very high | high | Neutral | Low | very low |
|------------------------------------------------------------------------------------------------------|-----------|------|---------|-----|----------|
| Insufficient information and genuine research on sustainable materials and components.               |           |      |         |     |          |
| Lack of designers' expertise and awareness                                                           |           |      |         |     |          |
| Lack of expertise by the contractor/subcontractors.                                                  |           |      |         |     |          |
| Unawareness on the part of the client.                                                               |           |      |         |     |          |
| The idea that sustainable design would forfeit aesthetic values.                                     |           |      |         |     |          |
| Lack of client understanding of the economic and environmental advantages of sustainable techniques. |           |      |         |     |          |
| The belief that sustainable practices do not raise the property's worth.                             |           |      |         |     |          |

|                                                                                                | Very high | high | Neutral | Low | very low |
|------------------------------------------------------------------------------------------------|-----------|------|---------|-----|----------|
| Lack of environmental assessment tools adaptable to many project types.                        |           |      |         |     |          |
| Absence of laws, regulations, and a legal framework tailored to certain sorts of undertakings. |           |      |         |     |          |
| Absence of government support and incentives to encourage sustainable behaviour.               |           |      |         |     |          |
| Lack of government encouragement of sustainable practices.                                     |           |      |         |     |          |
| Absence of strict regulations enforcing sustainable behaviour.                                 |           |      |         |     |          |

|                                                                                                                | Very high | high | Neutral | Low | very low |
|----------------------------------------------------------------------------------------------------------------|-----------|------|---------|-----|----------|
| The absence of training for designers, such as seminars and conferences given by representative organizations. |           |      |         |     |          |
| Lack of dependable and appropriate technology.                                                                 |           |      |         |     |          |
| Lack of expertise and technical knowledge among designers.                                                     |           |      |         |     |          |
| Insufficient experienced labour.                                                                               |           |      |         |     |          |
